# Supplementary material for: Statistical analysis of differential gene expression relative to a fold change threshold on NanoString data of mouse odorant receptor genes
Source: PubMed Central journal article supplement (PMC4016238; doi:10.1186/1471-2105-15-39), 2014-02-04

### Simulated FC between test and control = 1.3

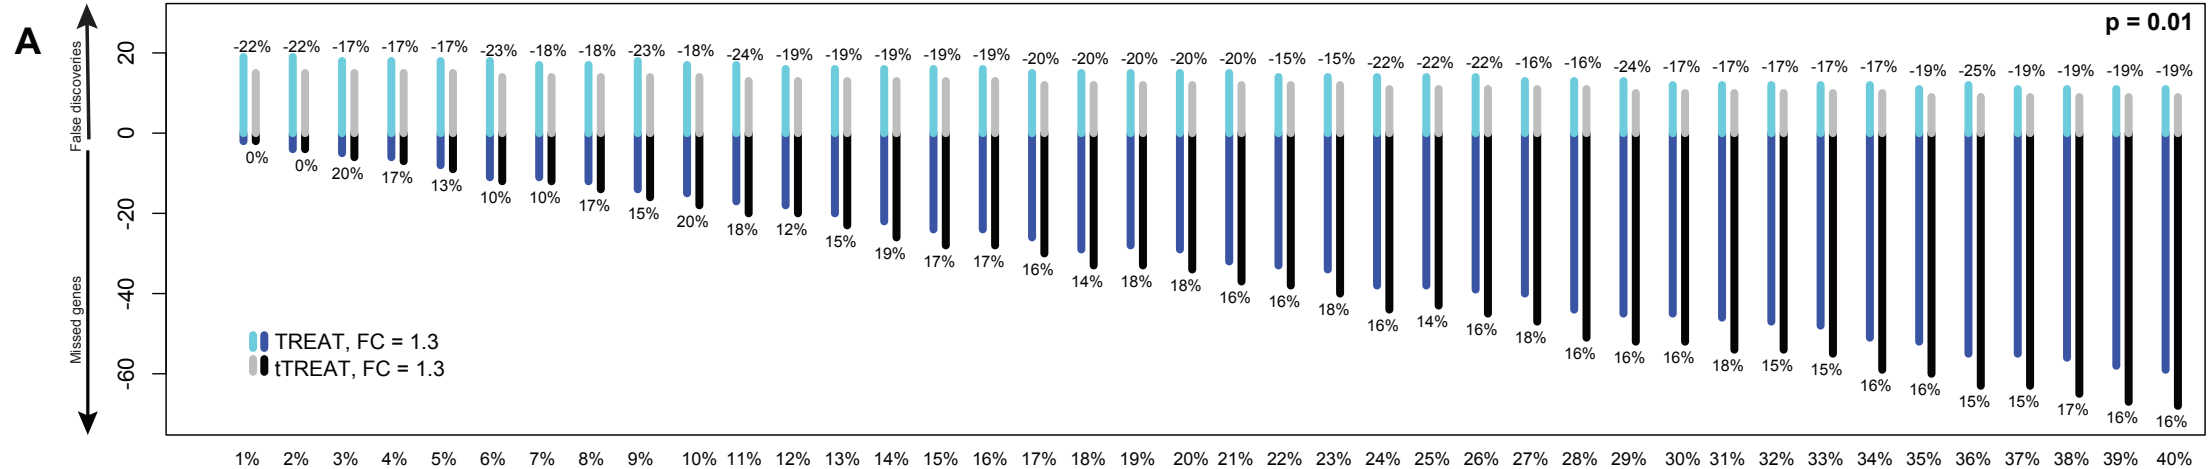

### Simulated FC between test and control = 1.5

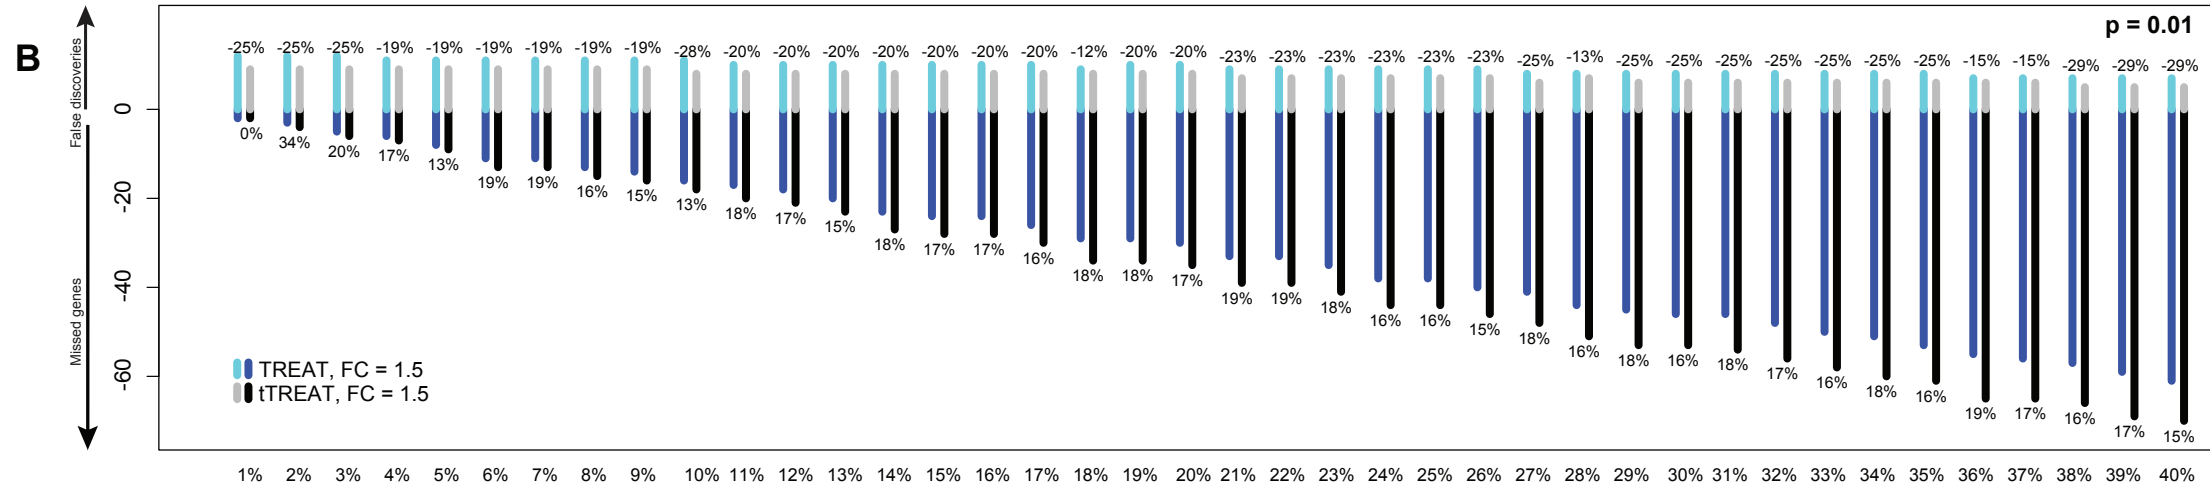

### Simulated FC between test and control = 2

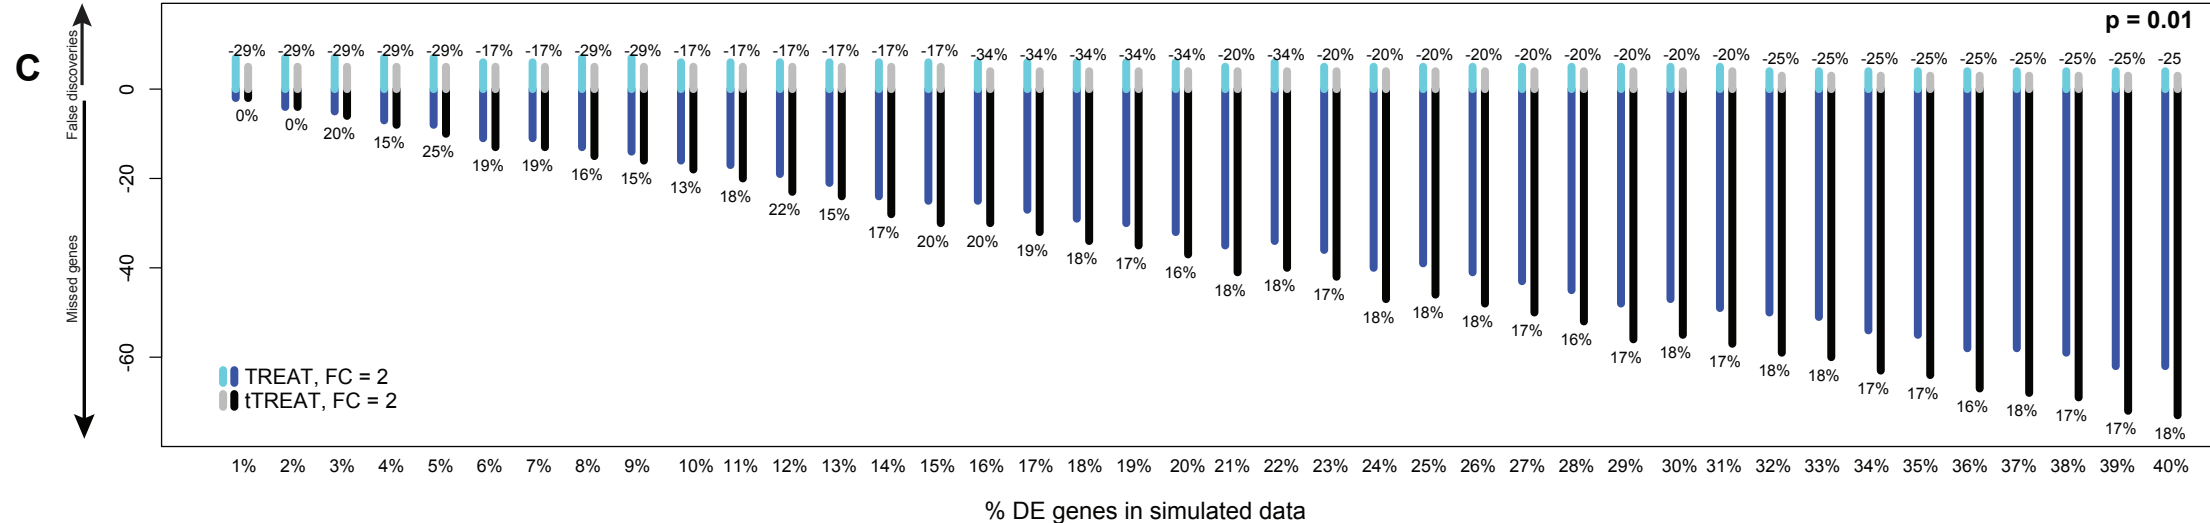

Supplement: 1471-2105-15-39-S1.pdf [file 1471-2105-15-39-S1.pdf]
