# Supplementary material for: Statistical analysis of differential gene expression relative to a fold change threshold on NanoString data of mouse odorant receptor genes
Source: PubMed Central journal article supplement (PMC4016238; doi:10.1186/1471-2105-15-39), 2014-02-04
Supplement: 1471-2105-15-39-S2.pdf [file 1471-2105-15-39-S2.pdf]

Additional File 2: mean false discoveries and missed genes, together with 95% prediction intervals on simulated data

FD\* and MG<sup>§</sup> results completing Figure 1

p = 0.05

**Simulated FC between test and control = 1.3**

|                  |                         | 1% DE genes | 10% DE genes | 20% DE genes |
|------------------|-------------------------|-------------|--------------|--------------|
| TREAT, FC = 1.3  | FD* [95%PI]             | 48 [34-63]  | 43 [30-57]   | 39 [27-52]   |
| tTREAT, FC = 1.3 | FD* [95%PI]             | 34 [23-46]  | 30 [20-41]   | 27 [17-38]   |
| TREAT, FC = 1.3  | MG <sup>§</sup> [95%PI] | 2 [0-5]     | 10 [2-19]    | 21 [9-34]    |
| tTREAT, FC = 1.3 | MG <sup>§</sup> [95%PI] | 2 [0-6]     | 12 [3-22]    | 25 [13-38]   |

**Simulated FC between test and control = 1.5**

|                  |                         |            |            |            |
|------------------|-------------------------|------------|------------|------------|
| TREAT, FC = 1.5  | FD* [95%PI]             | 31 [21-42] | 28 [17-39] | 24 [14-35] |
| tTREAT, FC = 1.5 | FD* [95%PI]             | 21 [12-30] | 19 [11-28] | 17 [9-26]  |
| TREAT, FC = 1.5  | MG <sup>§</sup> [95%PI] | 1 [0-4]    | 11 [3-20]  | 21 [10-33] |
| tTREAT, FC = 1.5 | MG <sup>§</sup> [95%PI] | 1 [0-4]    | 13 [4-23]  | 26 [13-39] |

1% DE genes 10% DE genes 20% DE genes

**Simulated FC between test and control = 2**

|                |                         |            |           |            |
|----------------|-------------------------|------------|-----------|------------|
| TREAT, FC = 2  | FD* [95%PI]             | 18 [10-27] | 16 [8-25] | 14 [6-22]  |
| tTREAT, FC = 2 | FD* [95%PI]             | 12 [6-19]  | 10 [4-17] | 9 [4-15]   |
| TREAT, FC = 2  | MG <sup>§</sup> [95%PI] | 2 [0-5]    | 11 [2-21] | 23 [12-35] |
| tTREAT, FC = 2 | MG <sup>§</sup> [95%PI] | 2 [0-5]    | 14 [4-25] | 28 [15-42] |

**Simulated FC between test and control = 1.3**

|                  |                         | 1% DE genes | 10% DE genes | 20% DE genes |
|------------------|-------------------------|-------------|--------------|--------------|
| TREAT, FC = 1.3  | FD* [95%PI]             | 19 [10-28]  | 17 [9-25]    | 15 [8-22]    |
| tTREAT, FC = 1.3 | FD* [95%PI]             | 15 [8-23]   | 14 [7-21]    | 12 [5-19]    |
| TREAT, FC = 1.3  | MG <sup>§</sup> [95%PI] | 2 [0-5]     | 15 [5-25]    | 30 [16-44]   |
| tTREAT, FC = 1.3 | MG <sup>§</sup> [95%PI] | 2 [0-5]     | 17 [6-28]    | 34 [19-49]   |

p = 0.01

|                  |                         |           |           |            |
|------------------|-------------------------|-----------|-----------|------------|
| TREAT, FC = 1.5  | FD* [95%PI]             | 12 [5-19] | 11 [5-17] | 10 [4-16]  |
| tTREAT, FC = 1.5 | FD* [95%PI]             | 9 [3-15]  | 8 [3-13]  | 7 [2-13]   |
| TREAT, FC = 1.5  | MG <sup>§</sup> [95%PI] | 2 [0-5]   | 16 [6-26] | 30 [15-45] |
| tTREAT, FC = 1.5 | MG <sup>§</sup> [95%PI] | 2 [0-5]   | 18 [8-28] | 35 [20-50] |

1% DE genes 10% DE genes 20% DE genes

**Simulated FC between test and control = 1.5**

1% DE genes 10% DE genes 20% DE genes

**Simulated FC between test and control = 2**

1% DE genes 10% DE genes 20% DE genes

FD and MG results completing Figure 2

p = 0.01

|                |                         |          |           |            |
|----------------|-------------------------|----------|-----------|------------|
| TREAT, FC = 2  | FD* [95%PI]             | 7 [2-12] | 6 [1-11]  | 6 [2-11]   |
| tTREAT, FC = 2 | FD* [95%PI]             | 5 [1-10] | 5 [1-9]   | 4 [0-8]    |
| TREAT, FC = 2  | MG <sup>§</sup> [95%PI] | 2 [0-5]  | 16 [6-26] | 32 [16-48] |
| tTREAT, FC = 2 | MG <sup>§</sup> [95%PI] | 2 [0-5]  | 19 [8-30] | 37 [20-25] |

**Simulated FC between tets and control = 1.5 and Stringent test**

|                       |                         | 1% DE genes | 10% DE genes | 20% DE genes |
|-----------------------|-------------------------|-------------|--------------|--------------|
| tTREAT, FC = 1.5      | FD* [95%PI]             | 10 [4-16]   | 8 [3-13]     | 8 [3-14]     |
| tTREAT, FC = 2.5      | FD* [95%PI]             | 1 [0-2]     | 1 [0-2]      | 1 [0-2]      |
| tTREAT2, FC = 2.5/1.5 | FD* [95%PI]             | 7 [2-12]    | 6 [1-11]     | 6 [1-11]     |
| tTREAT, FC = 1.5      | MG <sup>§</sup> [95%PI] | 2 [0-6]     | 18 [7-29]    | 36 [21-51]   |
| tTREAT, FC = 2.5      | MG <sup>§</sup> [95%PI] | 3 [0-7]     | 28 [15-41]   | 55 [36-74]   |
| tTREAT2, FC = 2.5/1.5 | MG <sup>§</sup> [95%PI] | 2 [0-6]     | 19 [8-30]    | 36 [21-51]   |

FD and MG results completing Figure 3

**p = 0.01**

**Simulated FC between test and control = 2.5 and non-stringent test**

|                       |                         | 1% DE genes | 10% DE genes | 20% DE genes |
|-----------------------|-------------------------|-------------|--------------|--------------|
| tTREAT, FC = 2.5      | FD* [95%PI]             | 4 [0-8]     | 4 [0-8]      | 3 [0-6]      |
| tTREAT, FC = 1.5      | FD* [95%PI]             | 53 [35-71]  | 48[30-66]    | 42 [26-58]   |
| TREAT2, FC = 2.5/1.5  | FD* [95%PI]             | 48 [27-59]  | 43 [27-59]   | 37 [22-52]   |
| tTREAT, FC = 2.5      | MG <sup>§</sup> [95%PI] | 2 [0-5]     | 20 [8-32]    | 38 [22-54]   |
| tTREAT, FC = 1.5      | MG <sup>§</sup> [95%PI] | 1 [0-3]     | 10 [2-18]    | 20 [8-32]    |
| tTREAT2, FC = 2.5/1.5 | MG <sup>§</sup> [95%PI] | 1 [0-3]     | 10 [2-18]    | 20 [8-32]    |

\* FD = False Discoveries, the mean over 400 simulations

§ MG = Missed Genes, the mean over 400 simulations
