# Supplementary material for: Statistical analysis of differential gene expression relative to a fold change threshold on NanoString data of mouse odorant receptor genes
Source: PubMed Central journal article supplement (PMC4016238; doi:10.1186/1471-2105-15-39), 2014-02-04

### Simulated FC between test and control = 1.5

**A**

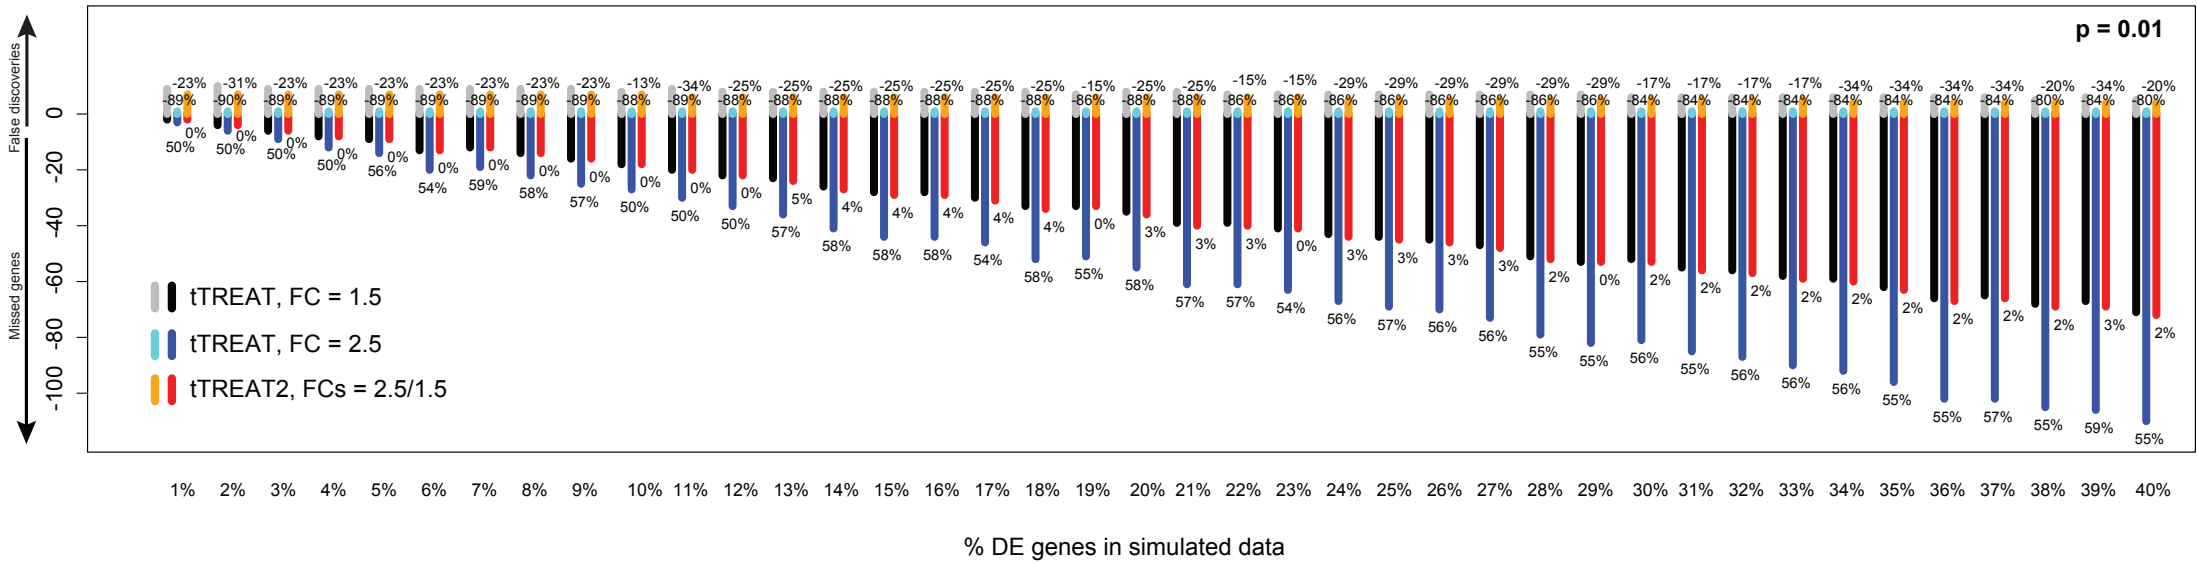

**B**

### Simulated FC between test and control = 2.5

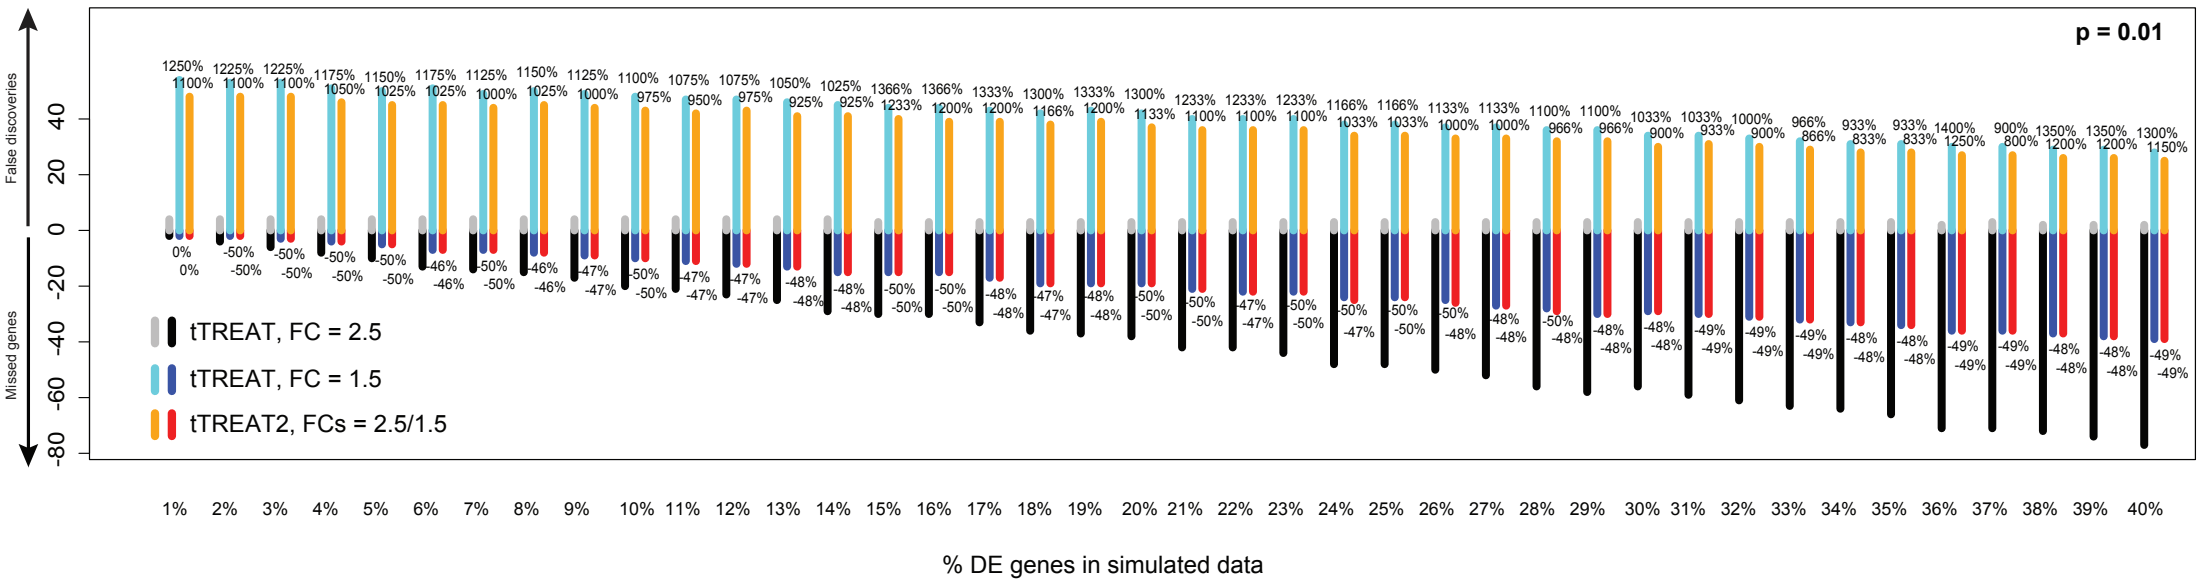

Supplement: 1471-2105-15-39-S3.pdf [file 1471-2105-15-39-S3.pdf]
